# Supplementary material for: Anti-inflammatory effect of rosiglitazone is not reflected in expression of NFκB-related genes in peripheral blood mononuclear cells of patients with type 2 diabetes mellitus
Source: Springer Nature journal article supplement (doi:10.1186/1472-6823-9-8), 2009-02-25
Supplement: Additional file 1 [file 1472-6823-9-8-s1.pdf]

**Additional file 1 - NFκB-related genes measured with the NFκB RT<sup>2</sup>Profiler PCR array**

| Gene name         | Gene function                                                                     | Unigene code |
|-------------------|-----------------------------------------------------------------------------------|--------------|
| AGT <sup>#</sup>  | Angiotensinogen (serpin peptidase inhibitor, clade A, member 8)                   | Hs.19383     |
| AKT1              | V-akt murine thymoma viral oncogene homolog 1                                     | Hs.525622    |
| ATF1              | Activating transcription factor 1                                                 | Hs.435267    |
| BCL10             | B-cell CLL/lymphoma 10                                                            | Hs.567382    |
| BCL3              | B-cell CLL/lymphoma 3                                                             | Hs.31210     |
| BF                | B-factor, properdin                                                               | Hs.69771     |
| BIRC2             | Baculoviral IAP repeat-containing 2                                               | Hs.503704    |
| CARD4             | Caspase recruitment domain family, member 4                                       | Hs.405153    |
| CASP1             | Caspase 1, apoptosis-related cysteine peptidase (interleukin 1, beta, convertase) | Hs.2490      |
| CASP8             | Caspase 8, apoptosis-related cysteine peptidase                                   | Hs.369736    |
| CCL2              | Chemokine (C-C motif) ligand 2                                                    | Hs.303649    |
| CD40              | CD40 antigen (TNF receptor superfamily member 5)                                  | Hs.472860    |
| CFLAR             | CASP8 and FADD-like apoptosis regulator                                           | Hs.390736    |
| CHUK              | Conserved helix-loop-helix ubiquitous kinase                                      | Hs.198998    |
| CSF2 <sup>#</sup> | Colony stimulating factor 2 (granulocyte-macrophage)                              | Hs.1349      |
| CSF3 <sup>#</sup> | Colony stimulating factor 3 (granulocyte)                                         | Hs.2233      |
| SLC44A2           | Solute carrier family 44, member 2                                                | Hs.515134    |
| EDARADD           | EDAR-associated death domain                                                      | Hs.352224    |
| EDG2              | Endothelial differentiation, lysophosphatidic acid G-protein-                     | Hs.126667    |

|                    |                                                                               |           |
|--------------------|-------------------------------------------------------------------------------|-----------|
|                    | coupled receptor, 2                                                           |           |
| EGR1 <sup>#</sup>  | Early growth response 1                                                       | Hs.326035 |
| ELK1 <sup>#</sup>  | ELK1, member of ETS oncogene family                                           | Hs.181128 |
| F2R                | Coagulation factor II (thrombin) receptor                                     | Hs.482562 |
| FADD               | Fas (TNFRSF6)-associated via death domain                                     | Hs.86131  |
| FASLG              | Fas ligand (TNF superfamily, member 6)                                        | Hs.2007   |
| FOS                | V-fos FBJ murine osteosarcoma viral oncogene homolog                          | Hs.25647  |
| GJA1               | Gap junction protein, alpha 1, 43kDa (connexin 43)                            | Hs.74471  |
| HMOX1              | Heme oxygenase (decycling) 1                                                  | Hs.517581 |
| HTR2B              | 5-hydroxytryptamine (serotonin) receptor 2B                                   | Hs.421649 |
| ICAM1              | Intercellular adhesion molecule 1 (CD54), human rhinovirus receptor           | Hs.515126 |
| IFNA1 <sup>#</sup> | Interferon, alpha 1                                                           | Hs.37026  |
| IFNB1              | Interferon, beta 1, fibroblast                                                | Hs.93177  |
| IFNG               | Interferon, gamma                                                             | Hs.856    |
| IKBKB              | Inhibitor of kappa light polypeptide gene enhancer in B-cells, kinase beta    | Hs.413513 |
| IKBKE              | Inhibitor of kappa light polypeptide gene enhancer in B-cells, kinase epsilon | Hs.321045 |
| IKBKG              | Inhibitor of kappa light polypeptide gene enhancer in B-cells, kinase gamma   | Hs.43505  |
| IL10 <sup>#</sup>  | Interleukin 10                                                                | Hs.193717 |
| IL1A <sup>#</sup>  | Interleukin 1, alpha                                                          | Hs.1722   |
| IL1B               | Interleukin 1, beta                                                           | Hs.126256 |

|        |                                                                                         |           |
|--------|-----------------------------------------------------------------------------------------|-----------|
| IL1R1  | Interleukin 1 receptor, type I                                                          | Hs.557403 |
| IL6    | Interleukin 6 (interferon, beta 2)                                                      | Hs.512234 |
| IL8    | Interleukin 8                                                                           | Hs.624    |
| IRAK1  | Interleukin-1 receptor-associated kinase 1                                              | Hs.522819 |
| IRAK2  | Interleukin-1 receptor-associated kinase 2                                              | Hs.449207 |
| JUN    | V-jun sarcoma virus 17 oncogene homolog (avian)                                         | Hs.525704 |
| LTA    | Lymphotoxin alpha (TNF superfamily, member 1)                                           | Hs.36     |
| LTBR   | Lymphotoxin beta receptor (TNFR superfamily, member 3)                                  | Hs.1116   |
| MALT1  | Mucosa associated lymphoid tissue lymphoma translocation<br>gene 1                      | Hs.180566 |
| MAP3K1 | Mitogen-activated protein kinase kinase kinase 1                                        | Hs.508461 |
| MYD88  | Myeloid differentiation primary response gene (88)                                      | Hs.82116  |
| NALP12 | NACHT, leucine rich repeat and PYD containing 12                                        | Hs.367965 |
| NFKB1  | Nuclear factor of kappa light polypeptide gene enhancer in B-<br>cells 1 (p105)         | Hs.431926 |
| NFKB2  | Nuclear factor of kappa light polypeptide gene enhancer in B-<br>cells 2 (p49/p100)     | Hs.73090  |
| NFKBIA | Nuclear factor of kappa light polypeptide gene enhancer in B-<br>cells inhibitor, alpha | Hs.81328  |
| PPM1A  | Protein phosphatase 1A (formerly 2C), magnesium-dependent,<br>alpha isoform             | Hs.130036 |
| RAF1   | V-raf-1 murine leukemia viral oncogene homolog 1                                        | Hs.159130 |
| REL    | V-rel reticuloendotheliosis viral oncogene homolog (avian)                              | Hs.370620 |
| RELA   | V-rel reticuloendotheliosis viral oncogene homolog A, nuclear                           | Hs.502875 |

|           |                                                                                                                                          |           |
|-----------|------------------------------------------------------------------------------------------------------------------------------------------|-----------|
|           | factor of kappa light polypeptide gene enhancer in B-cells 3,<br>p65 (avian)                                                             |           |
| RELB      | V-rel reticuloendotheliosis viral oncogene homolog B, nuclear<br>factor of kappa light polypeptide gene enhancer in B-cells 3<br>(avian) | Hs.307905 |
| RFP2      | Ret finger protein 2                                                                                                                     | Hs.436922 |
| RHOA      | Ras homolog gene family, member A                                                                                                        | Hs.247077 |
| RIPK1     | Receptor (TNFRSF)-interacting serine-threonine kinase 1                                                                                  | Hs.519842 |
| SLC20A1   | Solute carrier family 20 (phosphate transporter), member 1                                                                               | Hs.187946 |
| STAT1     | Signal transducer and activator of transcription 1, 91kDa                                                                                | Hs.470943 |
| TBK1      | TANK-binding kinase 1                                                                                                                    | Hs.505874 |
| TICAM2    | Toll-like receptor adaptor molecule 2                                                                                                    | Hs.278391 |
| TLR1      | Toll-like receptor 1                                                                                                                     | Hs.111805 |
| TLR2      | Toll-like receptor 2                                                                                                                     | Hs.519033 |
| TLR3      | Toll-like receptor 3                                                                                                                     | Hs.29499  |
| TLR4      | Toll-like receptor 4                                                                                                                     | Hs.174312 |
| TLR6      | Toll-like receptor 6                                                                                                                     | Hs.366986 |
| TLR7      | Toll-like receptor 7                                                                                                                     | Hs.443036 |
| TLR8      | Toll-like receptor 8                                                                                                                     | Hs.272410 |
| TLR9      | Toll-like receptor 9                                                                                                                     | Hs.87968  |
| TMED4     | Transmembrane emp24 protein transport domain containing 4                                                                                | Hs.510745 |
| TNF       | Tumor necrosis factor (TNF superfamily, member 2)                                                                                        | Hs.241570 |
| TNFAIP3   | Tumor necrosis factor, alpha-induced protein 3                                                                                           | Hs.211600 |
| TNFRSF10A | Tumor necrosis factor receptor superfamily, member 10a                                                                                   | Hs.401745 |

|                      |                                                        |           |
|----------------------|--------------------------------------------------------|-----------|
| TNFRSF10B            | Tumor necrosis factor receptor superfamily, member 10b | Hs.521456 |
| TNFRSF1A             | Tumor necrosis factor receptor superfamily, member 1A  | Hs.279594 |
| TNFRSF7              | Tumor necrosis factor receptor superfamily, member 7   | Hs.355307 |
| TNFSF10              | Tumor necrosis factor (ligand) superfamily, member 10  | Hs.478275 |
| TNFSF14 <sup>#</sup> | Tumor necrosis factor (ligand) superfamily, member 14  | Hs.129708 |
| TRADD                | TNFRSF1A-associated via death domain                   | Hs.460996 |
| TICAM1               | Toll-like receptor adaptor molecule 1                  | Hs.29344  |

# Genes undetectable in PBMCs (Ct expression value >35)
